# Supplementary material
Source: MDPI journal article supplement (https://www.mdpi.com/2813-9844/6/2/34)
Supplement: s1 [file s1]

Archive with 2 entries (2 files):
- SM-1-The Attachment-Caregiving Questionnaire (ACQ).pdf
- SM-2-Data.xlsx
