# Supplementary material
Source: MDPI journal article supplement (https://www.mdpi.com/2813-9844/6/2/34)
Supplement: s1 [file s1 › SM-2-Data.xlsx]

## Sheet: ACQData
0	1	2	3	4	5	6	7	8	9	10	11	12	13	14	15	16	17	18	19	20	21	22	23	24	25	26	27	28	29	30	31	32	33	34	35	36	37	38	39	40	41	42	43	44	45	46	47	48	49
Timestamp	Version	Code	Sex	Gender	Sexual Orientation	Ethnicity	Age	Void	Weight in Kg Please, insert your weight in Kg rounding to the nearest ten. For example, insert 65 if your weight is 65,3 Kg or 92 if your weight is 91,7 kg.	Void	Void	Height in cm Please, insert your height in cm – for example, 162 cm or 185 cm.	Void	Void	Education Please, select your highest achievement. (The indicated ages are merely illustrative)	Occupation	Nationality	Native Language	Please, rate your English level	What is your Native Language:	Have you ever had children?	How many?	How old were you when you had your first child?	How old were you when you had your last child? [ Please, if you only had one child, just select the corresponding item from the list. ]	Are they all living?	Do you have or did you have any siblings?	How many?	Of your siblings, how old is (or was) the youngest compared to you?	Of your siblings, how old is (or was) the oldest compared to you? [ Please, if you only have (or had) one sibling, just select the corresponding item from the list. ]	Are they all living?	Do you think you currently suffer from any form of psychological discomfort?	Can you select one of the items on this list, if any, that can describe – at least partially – the core of your discomfort?	Have you ever suffered from panic attacks? [ A panic attack is an event of acute fear and physiological activation in which one fears for their health or even life. ]	Have you ever suffered from depression? [ Depression is a period of exceptionally negative mood and thoughts, in which one feels they have no way out, no hope. ]	Have you ever suffered from an eating disorder (anorexia, bulimia, and/or obesity)? [ Anorexia is voluntarily maintaining an insufficient diet which leads to having an extremely low weight (much lower than the norm expected by gender and age). Bulimia consists of having binges (eating a lot in a short time) and trying to compensate for them with subsequent physical activity, laxatives, vomiting, …	Have you ever suffered from an obsessive-compulsive disorder? [ An obsessive-compulsive disorder is characterized by obsessions and compulsions. Obsessions are intrusive (namely, that come involuntarily and unwanted) ideas of very unpleasant and disturbing things. Compulsions are acts (physical or mental) that are performed repeatedly (as rituals) to get rid of the aforementioned intrusive ideas.…	Have you ever suffered from a post-traumatic stress disorder? [ An event is traumatic for us when we perceive it as seriously health-threatening or even lethal – for us or a loved one – and it makes us feel helpless in that situation. A post-traumatic stress disorder is the disturbing and lasting consequence of a traumatic event that cannot be overcome. ]	Have you ever received a formal diagnosis from a mental health professional? (if not currently, in the past)	What (main) diagnosis have you received? [ We indicate below a partial and simplified list of disorders often diagnosed. If possible, please indicate the one corresponding to the (main) condition you have been diagnosed with. ]	Have you been diagnosed with an additional condition besides the main one? [ We indicate below a partial and simplified list of disorders often diagnosed. If possible, please indicate the one corresponding to the additional condition you have been diagnosed with – if any. Otherwise, please select 'No Additional Condition'. ]	Have you ever been helped by (at least) a psychotherapist? [ By 'psychotherapist', we mean a mental health professional who supports you – discussing with you – in tackling issues that are problematic for you. ]	Could you please select one of the items on this list, if any, that can describe the principal reason for being helped?	How long have you used psychotherapy altogether?	How do you rate the result of this experience?	Has any of these conditions ever been diagnosed to you?	Do you currently suffer – or think to suffer – from any serious physical-health issue?	Could you please indicate the main problem? [ We indicate below a partial and simplified list of physical issues. If possible, please indicate the one corresponding to your main problem. ]	Is there any other issue – concerning you, other people, or your relationship – that currently seriously worries you?	Could you please select one of the items on this list, if any, that can describe this issue?
		P01	2	2	1	1	36		51			168			13	4	1	1			2					1	1	19	0	Si	2		5	2	1	1	1	2			1	3	7	5	6	2		1	4
		P02	2	2	1	1	25		54			163			6	1	1	1			2					2					1	1	5	7	7	3	7	2			1	1	4	5	6	2		1	3
		P03	2	2	1	1	28		67			169			8	16	1	1			2					1	1	32	0	Si	1	5	4	7	7	7	4	1	1	11	1	31	2	5	6	2		1	1
		P04	1	1	1	1	28		70			171			6	7	1	1			2					1	1	29	29	Si	1	31	7	7	3	1	1	1	1	19	1	31	9	6	6	1	5	1	1
		P05	1	1	1	1	28		75			172			11	2	1	1			2					2					1	20	6	3	1	2	2	2			2				6	1	23	1	2
		P06	2	2	1	1	32		55			175			8	7	1	1			2					2					1	9	5	6	1	3	5	2			2				6	2		1	9
		P07	1	1	1	1	34		84			191			11	5	1	1			2					1	1	18	0	Si	2		3	1	1	1	2	2			1	2	4	4	6	2		2
		P08	2	2	1	1	52		66			170			6	14	1	1			2					1	9	22	34	Si	1	23	7	7	7	3	5	1	11	0	1	8	13	5	6	1	39	1	26
		P09	1	2	1	1	20		65			170			6	1	1	1			2					2					1	3	3	4	1	7	2	2			2				6	2		1	1
		P10	1	1	1	1	37		80			180			8	7	1	1			2					1	2	26	26	Si	2		4	5	2	2	6	2			1	3	1	4	6	2		1	4
		P11	2	2	1	1	27		65			167			8	14	1	1			2					1	1	25	25	Si	1	3	1	1	1	1	3	2			2				6	2		1	15
		P12	2	2	1	1	26		58			169			11	5	1	1			2					1	1	27	0	Si	1	5	3	2	1	2	1	2			2				6	2		1	1
		P13	1	1	5	1	26		83			183			6	11	1	1			2					1	1	18	0	Si	1	11	6	4	1	5	6	1	2	0	1	22	1	4	6	2		1	26
		P14	2	2	1	1	35		56			165			11	3	1	1			2					1	2	19	0	Si	2		5	4	4	3	1	2			1	23	3	7	6	2		2
		P15	2	2	1	1	40		78			165			8	12	1	1			1	2	35	0	1	1	1	16	0	Si	2		6	6	1	2	6	2			1	15	6	3	6	2		1	18
		P16	2	2	2	1	59		76			167			6	10	1	1			2					2					1	3	1	2	1	2	2	2			1	3	3	4	6	2		1	3
		P17	2	2	1	1	45		63			160			6	14	1	1			2					1	2	17	0	Si	1	28	6	2	2	2	4	2			2				6	2		1	10
		P18	2	2	1	1	31		65			168			11	4	1	1			2					1	1	17	0	Si	1	28	7	4	5	1	1	1	34	0	1	28	9	6	6	2		2
		P19	2	2	1	1	26		49			167			6	1	1	1			2					1	3	9	24	Si	1	28	6	7	2	2	4	1	2	1	1	28	4	5	6	1	17	1	28
		P20	2	2	1	1	32		51			155			7	8	1	1			1	2	31	31	1	1	1	24	24	Si	2		5	1	5	4	4	2			1	12	2	7	6	2		2
		P21	2	2	1	1	58		63			164			7	8	1	1			2					1	2	27	0	Si	2		4	3	1	1	6	1	2	2	1	9	3	7	6	2		1	10
		P22	2	2	1	1	61		70			163			6	13	1	1			1	2	26	26	1	1	3	19	18	Si	1	11	7	7	1	1	7	1	1	2	1	11	5	5	6	2		1	15
		P23	2	2	1	1	20		60			163			6	1	1	1			2					1	2	23	0	Si	1	3	2	3	5	1	3	2			1	1	5	5	6	2		1	3
		P24	2	2	1	1	50		65			153			12	14	1	1			2					1	1	21	0	Si	1	5	1	7	6	4	6	1	1	15	1	7	12	5	6	1	18	2
		P25	2	2	1	1	37		55			163			13	4	1	1			2					1	2	19	0	Si	2		5	5	5	5	1	2			1	3	3	7	6	2		2
		P26	2	2	1	1	23		47			150			6	1	1	1			2					1	1	24	0	Si	1	3	3	5	1	4	6	2			1	23	2	6	6	2		1	26
		P27	1	1	1	1	42		65			176			7	12	1	1			2					1	2	18	0	Si	1	17	6	1	1	5	6	2			1	17	2	5	6	2		1	5
		P28	2	2	3	1	30		64			172			8	15	1	1			2					2					1	31	7	7	6	6	7	1	1	2	1	31	4	5	6	2		1	16
		P29	2	2	1	1	35		80			160			13	5	1	1			1	2	33	0	1	1	5	35	38	Si	1	6	1	2	2	2	2	2			2				6	2		1	24
		P30	2	2	1	1	26		75			171			8	5	1	1			2					1	4	25	33	Si	1	3	1	1	3	1	2	2			1	14	2	5	6	2		1	24
		P31	2	2	1	1	53		86			162			6	13	1	1			1	2	30	30	1	1	2	22	27	Si	1	11	7	7	5	5	6	1	29	1	1	11	13	6	2	1	33	1	13
		P32	2	2	1	1	54		68			170			8	7	1	1			1	2	47	0	1	1	4	23	24	Si	1	31	1	3	2	3	5	2			1	3	13	5	6	1	14	1	7
		P33	2	2	1	1	35		59			168			14	2	1	1			2					1	5	16	19	Si	1	22	6	3	5	3	2	2			1	1	4	5	6	2		1	26
		P34	2	2	1	1	51		91			174			12	3	1	1			2					2					1	12	2	7	1	5	6	1	1	0	1	12	7	7	5	2		2
		P35	2	2	2	1	31		70			173			12	6	1	1			2					2					1	3	1	4	1	6	2	2			2				6	2		1	26
		P36	2	2	1	1	40		88			172			12	3	1	1			1	1	37	37	1	1	2	15	0	Si	1	28	1	2	1	6	6	2			1	11	3	5	0	1	45	1	28
		P37	2	2	1	1	48		56			173			6	12	1	1			2					1	1	13	0	Si	1	6	3	7	7	3	6	1	1	0	1	15	6	5	6	2		2
		P38	1	1	1	1	27		80			185			10	6	1	1			2					1	5	24	27	Si	1	2	5	5	1	5	3	2			2				6	1	37	1	17
		P39	2	2	1	1	55		58			160			14	3	1	1			2					1	1	25	19	Si	1	9	5	4	4	4	1	2			1	11	4	5	6	1	22	1	4
		P40	2	2	1	1	32		57			171			13	13	1	1			2					1	3	18	24	Si	1	5	2	6	7	1	1	2			1	3	4	6	6	2		2
		P41	2	2	1	1	24		44			160			8	1	1	1			2					1	1	27	27	Si	1	33	3	6	6	1	4	2			2				6	2		1	8
		P42	2	2	1	1	35		63			178			8	7	1	1			2					1	1	19	0	Si	1	4	1	2	2	2	1	2			2				6	2		2
		P43	1	1	1	1	42		82			192			9	18	1	1			2					1	2	22	28	Si	1	15	6	7	1	2	6	2			2				6	2		1	4
		P44	1	1	1	1	31		73			176			6	7	1	1			2					2					2		5	6	1	3	2	2			2				6	2		2
		P45	2	2	1	1	31		57			155			6	14	1	1			2					2					1	14	1	1	1	1	1	2			1	14	1	7	6	2		2
		P46	1	1	2	1	33		124			190			6	12	1	1			2					1	1	14	0	Si	1	5	5	6	7	2	2	2			1	33	4	4	6	1	45	1	5
		P47	2	2	1	1	25		60			165			10	14	1	1			2					1	2	30	0	Si	1	2	2	6	1	2	4	2			2				6	2		1	26
		P48	2	2	1	1	63		75			162			12	10	1	1			2					1	3	9	24	Si	1	3	2	3	2	1	5	2			1	1	3	5	6	2		2
		P49	2	2	1	1	31		100			160			6	7	1	1			2					1	2	18	0	Si	1	6	7	6	7	4	3	2			1	27	4	7	6	1	24	2
		P50	2	2	1	1	35		53			167			9	4	1	1			2					1	1	13	0	Si	1	28	6	4	1	4	3	2			1	28	3	4	6	2		1	26
		P51	1	1	1	1	31		85			189			14	2	1	1			2					1	2	20	0	Si	1	22	2	6	1	2	2	2			1	5	5	6	0	2		1	26
		P52	2	2	1	1	27		60			175			9	13	1	1			2					2					1	1	2	4	1	7	2	1	14	0	1	1	4	3	6	2		2
		P53	2	2	1	1	48		61			173			6	14	1	1			2					1	2	23	23	Si	1	3	2	5	6	2	6	2			1	14	4	5	6	2		1	3
		P54	2	2	1	1	38		127			160			13	14	1	1			2					1	1	16	0	Si	2		7	1	7	1	5	2			1	2	1	5	6	2		1	24
		P55	1	1	1	1	40		65			169			7	16	1	1			2					1	1	22	0	Si	2		7	6	1	2	2	2			1	2	12	3	6	2		2
		P56	1	2	1	1	45		71			170			6	12	1	1			1	5	38	40	1	1	5	16	20	Si	2		3	2	1	1	3	2			1	15	3	5	6	2		1	8
		P57	2	2	1	1	26		63			160			8	14	1	1			2					1	2	22	26	Si	1	28	7	6	6	4	2	2			1	28	3	4	6	1	22	1	26
		P58	2	2	3	1	33		53			160			6	10	1	1			2					1	2	27	0	Si	1	1	7	5	1	6	6	2			1	12	1	4	6	1	18	1	26
		P59	2	2	1	1	27		63			170			13	13	1	1			2					2					1	28	2	6	2	6	3	2			1	1	1	6	6	2		1	26
		P60	2	2	1	1	27		52			166			8	1	1	1			2					1	2	32	32	Si	1	28	5	5	1	5	6	2			1	20	5	7	6	1	18	1	10
		P61	1	1	1	1	36		95			185			6	5	1	1			2					1	2	17	0	Si	1	15	1	2	1	2	2	2			2				6	2		2
		P62	2	2	1	1	22		52			158			8	1	1	1			2					2					1	11	7	3	1	1	6	1	2	2	1	28	2	4	6	2		2
		P63	2	2	1	1	33		54			167			6	14	1	1			2					1	3	33	34	Si	1	3	3	2	1	6	6	2			1	10	5	5	6	2		1	3
		P64	2	2	1	1	56		76			173			6	14	1	1			1	[2] 1 Figlio e 1 Figlia	22	26	1	1	6	10	19	Si	1	15	7	6	7	6	7	2			1	15	3	6	0	2		1	13
		P65	2	2	1	1	38		52			165			10	6	1	1			2					1	3	34	36	Si	1	6	7	7	1	2	6	2			1	9	3	7	6	2		2
		P66	2	2	1	7	42		63			168			11	5	2	2	8	2	2					1	1	14	0	Si	1	1	4	7	3	3	6	2			1	1	5	6	6	2		2
		P67	1	1	1	1	43		54			164			11	5	1	1			2					1	3	22	31	Si	2		2	4	1	1	1	2			1	18	13	5	6	1	20	1	12
[truncated: 354 more columns]

## Sheet: ACQCoding
0	1	2	3		4		5		6		7	9		12		15		16		17			18		19	20			21		22		23	24			26		27		28		29		30		31		32
Timestamp	v200419evo	Code	Sex	Code	Gender	Code	Sexual Orientation	Code	Ethnicity	Code	Age	Weight in Kg Please, insert your weight in Kg rounding to the nearest ten. For example, insert 65 if your weight is 65,3 Kg or 92 if your weight is 91,7 kg.	Code	Height in cm Please, insert your height in cm – for example, 162 cm or 185 cm.	Code	Education Please, select your highest achievement. (The indicated ages are merely illustrative)	Code	Occupation	Code	Nationality		Code	Native Language	Code	Please, rate your English level	What is your Native Language:		Code	Have you ever had children?	Code	How many?	Code	How old were you when you had your first child?	How old were you when you had your last child? [ Please, if you only had one child, just select the corresponding item from the list. ]	Code	Code	Do you have or did you have any siblings?	Code	How many?	Code	Of your siblings, how old is (or was) the youngest compared to you?	Code	Of your siblings, how old is (or was) the oldest compared to you? [ Please, if you only have (or had) one sibling, just select the corresponding item from the list. ]	Code	Are they all living?	Code	Do you think you currently suffer from any form of psychological discomfort?	Code	Can you select one of the items on this list, if any, that can describe – at least partially – the core of your discomfort?
			Male	1	Male	1	Heterosexual	1	European	1	18-120	Less than 20		100-230		01. I didn't attend any school	1	01. Student	1	001. Abkhazia	Italy	1	Italian	1	0	001. Akan	Italian	1	Yes	1	[1] 1 Son	1	I only had 1 child	I only had 1 child	0	1	Yes	1	[1] 1 Brother	1	More than 20 years younger than me	1	I only have (or had) 1 sibling	0	Yes	1	Yes	1	(1) General existential distress
			Female	2	Female	2	Homosexual	2	North African	2		20-350		More than 230		02. I attended school but didn't get any qualification	2	02. Professional in the Research/University Area (Researcher, University Professor etc.)	2	002. Afghanistan	Other	2	Other	2	1	002. Amharic	Other	2	No	2	[1] 1 Daughter	2				2	No	2	[1] 1 Sister	2	20 years younger than me	2	More than 20 years younger than me	1	No	2	No	2	(2) Understanding myself better
			Other	3	Fluid	3	Bisexual	3	Central-West African	3		More than 350				03. I completed elementary school (age 6-10)	3	03. Professional in the Education Area (School Teacher, etc.)	3	003. Albania					2	003. Arabic					[2] 1 Son and 1 Daughter	3							[2] 1 Brother and 1 Sister	3	19 years younger than me	3	20 years younger than me	2					(3) Understanding myself and my relationships with others better
					Trans	4	Asexual	4	Central-East African	4						04. I completed middle school (age 10-13)	4	04. Professional in the Health/Social Area (Doctor, Psychologist, Educator, Social Worker, etc.)	4	004. Algeria					3	004. Assamese					[2] 2 Sons	4							[2] 2 Brothers	4	18 years younger than me	4	19 years younger than me	3					(4) Difficulty reaching my goals
					Non-Binary	5	Uncertain	5	South African	5						05. I have a post middle school professional qualification	5	05. Professional in the Technical/Scientific Area (Engineer, Architect, Chemist, Programmer, etc.)	5	005. Andorra					4	005. Awadhi					[2] 2 Daughters	5							[2] 2 Sisters	5	17 years younger than me	5	18 years younger than me	4					(5) Self-esteem
					Queer	6	Other	6	Middle-Eastern	6						06. I completed high school (age 13-18)	6	06. Professional in the Legal/Administrative Area (Lawyer, Accountant, Bookkeper, Secretary, etc.)	6	006. Angola					5	006. Azerbaijani					[3] 2 Sons and 1 Daughter	6							[3] 2 Brothers and 1 Sister	6	16 years younger than me	6	17 years younger than me	5					(6) Understanding my own and others’ emotions better
					Other	7			Russian Asian	7						07. I have a post high school professional qualification	7	07. Professional in the Art/Entertainment Area (Musician, Actor, etc.)	7	007. Antigua and Barbuda					6	007. Balochi					[3] 2 Daughters and 1 Son	7							[3] 2 Sisters and 1 Brother	7	15 years younger than me	7	16 years younger than me	6					(7) Managing my serious illness
									Chinese	8						08. I have a bachelor degree	8	08. Professional in the Aesthetic/Wellness Area (Beautician, Coach, etc.)	8	008. Argentina					7	008. Belarusian					[3] 3 Sons	8							[3] 3 Brothers	8	14 years younger than me	8	15 years younger than me	7					(8) Managing a serious illness of a loved one
									Indian	9						09. I have a post-bachelor professional qualification	9	09. Professional in the Religious Area (Vicar, Priest, etc.)	9	009. Armenia					8	009. Bengali					[3] 3 Daughters	9							[3] 3 Sisters	9	13 years younger than me	9	14 years younger than me	8					(9) Managing a loss
									South-East Asian	10						10. I have a post-bachelor specialization	10	10. Professional in the Law Enforcement/Military Area (Policeman, Soldier, etc.)	10	010. Artsakh					9	010. Bhojpuri					[4] 2 Sons and 2 Daughters	10							[4] 2 Brothers and 2 Sisters	10	12 years younger than me	10	13 years younger than me	9					(10) Managing an abuse
									North American	11						11. I have a master degree	11	11. Manager of Commercial Activity (Goods)	11	011. Australia					10	011. Burmese					[4] 3 Sons and 1 Daughter	11							[4] 3 Brothers and 1 Sister	11	11 years younger than me	11	12 years younger than me	10					(11) Managing a traumatic event
									Central American	12						12. I have a post-master professional qualification	12	12. Employee of Commercial Activity (Goods) (Shop Assistant, etc.)	12	012. Austria						012. Cebuano (Visayan)					[4] 3 Daughters and 1 Son	12							[4] 3 Sisters and 1 Brother	12	10 years younger than me	12	11 years younger than me	11					(12) Difficulty in dealing with my mother
									South American	13						13. I have a post-master specialization	13	13. Office Manager (Services)	13	013. Azerbaijan						013. Chewa					[4] 4 Sons	13							[4] 4 Brothers	13	9 years younger than me	13	10 years younger than me	12					(13) Difficulty in dealing with my father
									Australian	14						14. I have a doctorate (PhD)	14	14. Office Clerk (Services) (Customer Care Employee, etc.)	14	014. Bahamas, The						014. Chhattisgarhi					[4] 4 Daughters	14							[4] 4 Sisters	14	8 years younger than me	14	9 years younger than me	13					(14) Difficulty in dealing with both my parents
									Mixed	15								15. Manual Worker (Construction Worker, Craftsman, etc.)	15	015. Bahrain						015. Chittagonian					[5] 4 Sons and 1 Daughter	15							[5] 4 Brothers and 1 Sister	15	7 years younger than me	15	8 years younger than me	14					(15) Difficulty in dealing with my partner
									Other	16								16. Unemployed	16	016. Bangladesh						016. Czech					[5] 4 Daughters and 1 Son	16							[5] 4 Sisters and 1 Brother	16	6 years younger than me	16	7 years younger than me	15					(16) Difficulty in dealing with my children
																		17. Retired	17	017. Barbados						017. Deccan					[5] 3 Sons and 2 Daughters	17							[5] 3 Brothers and 2 Sisters	17	5 years younger than me	17	6 years younger than me	16					(17) Difficulty in dealing with several of my family members
																		18. Other	18	018. Belarus						018. Dhundhari					[5] 3 Daughters and 2 Sons	18							[5] 3 Sisters and 2 Brothers	18	4 years younger than me	18	5 years younger than me	17					(18) Difficulty in dealing with my friends
																				019. Belgium						019. Dutch					[5] 5 Sons	19							[5] 5 Brothers	19	3 years younger than me	19	4 years younger than me	18					(19) Difficulty in dealing with my colleagues
																				020. Belize						020. Eastern Min					[5] 5 Daughters	20							[5] 5 Sisters	20	2 years younger than me	20	3 years younger than me	19					(20) Difficulty in my work/study
																				021. Benin						021. French					[6] Children	21							[6] Siblings	21	1 year younger than me	21	2 years younger than me	20					(21) Difficulty in some particular social situations
																				022. Bhutan						022. Fula					[7] Children	22							[7] Siblings	22	Same age as me	22	1 year younger than me	21					(22) Difficulty in many social situations, with people in general
																				023. Bolivia						023. Gan					[8] Children	23							[8] Siblings	23	1 year older than me	23	Same age as me	22					(23) Feeling generally dependent on one or some people
																				024. Bosnia and Herzegovina						024. German					[9] Children	24							[9] Siblings	24	2 years older than me	24	1 year older than me	23					(24) Feeling driven to behave differently from other people
																				025. Botswana						025. Greek					[10] Children	25							[10] Siblings	25	3 years older than me	25	2 years older than me	24					(25) Feeling driven to have antisocial behaviors (not accepted by society)
																				026. Brazil						026. Gujarati					More than 10 Children	26							More than 10 Siblings	26	4 years older than me	26	3 years older than me	25					(26) Feeling driven to have behaviors that are considered evil
																				027. Brunei						027. Haitian Creole															5 years older than me	27	4 years older than me	26					(27) Feeling generally under stress
																				028. Bulgaria						028. Hakka															6 years older than me	28	5 years older than me	27					(28) Feeling too much anxiety
																				029. Burkina Faso						029. Haryanvi															7 years older than me	29	6 years older than me	28					(29) Panic attacks
																				030. Burundi						030. Hausa															8 years older than me	30	7 years older than me	29					(30) Concern for my health
																				031. Cambodia						031. Hiligaynon/Ilonggo (Visayan)															9 years older than me	31	8 years older than me	30					(31) Feeling depressed
																				032 Cameroon						032. Hindi															10 years older than me	32	9 years older than me	31					(32) Problems with controlling my impulses
																				033. Canada						033. Hmong															11 years older than me	33	10 years older than me	32					(33) Problems with food
																				034. Cape Verde						034. Hungarian															12 years older than me	34	11 years older than me	33					(34) Problems with the use of substances
																				035. Central African Republic						035. Igbo															13 years older than me	35	12 years older than me	34					(35) Problems with gambling
																				036. Chad						036. Ilocano															14 years older than me	36	13 years older than me	35					(36) Obsession with certain fixed ideas
																				037. Chile						037. Italian															15 years older than me	37	14 years older than me	36					(37) Trouble living my sexuality
																				038. China						038. Japanese															16 years older than me	38	15 years older than me	37					(38) Distinguishing reality from fantasy
																				039. Colombia						039. Javanese															17 years older than me	39	16 years older than me	38					(39) No item on this list describes it
																				040. Comoros						040. Jin															18 years older than me	40	17 years older than me	39
																				041. Congo, Democratic Republic of the						041. Kannada															19 years older than me	41	18 years older than me	40
																				042. Congo, Republic of the						042. Kazakh															20 years older than me	42	19 years older than me	41
																				043. Costa Rica						043. Khmer															More than 20 years older than me	43	20 years older than me	42
																				044. Croatia						044. Kinyarwanda																	More than 20 years older than me	43
																				045. Cuba						045. Kirundi
																				046. Cyprus						046. Konkani
																				047. Czech Republic						047. Korean
																				048. Denmark						048. Kurdish
																				049. Djibouti						049. Madurese
																				050. Dominica						050. Magahi
																				051. Dominican Republic						051. Maithili
																				052. East Timor						052. Malagasy
																				053. Ecuador						053. Malay
																				054. Egypt						054. Malayalam
																				055. El Salvador						055. Mandarin
																				056. Equatorial Guinea						056. Marathi
																				057. Eritrea						057. Marwari
																				058. Estonia						058. Mossi
																				059. Eswatini						059. Nepali
																				060. Ethiopia						060. Northern Min
																				061. Fiji						061. Odia (Oriya)
																				062. Finland						062. Oromo
																				063. France						063. Pashto
																				064. Gabon						064. Persian
																				065. Gambia, The						065. Polish
																				066. Georgia						066. Portuguese
																				067. Germany						067. Punjabi
																				068. Ghana						068. Quechua
																				069. Greece						069. Romanian
																				070. Grenada						070. Russian
																				071. Guatemala						071. Saraiki
																				072. Guinea						072. Serbo-Croatian
																				073. Guinea-Bissau						073. Shona
																				074. Guyana						074. Sindhi
																				075. Haiti						075. Sinhala
																				076. Honduras						076. Somali
																				077. Hungary						077. Southern Min
																				078. Iceland						078. Spanish
																				079. India						079. Sundanese
																				080. Indonesia						080. Swedish
																				081. Iran						081. Sylheti
																				082. Iraq						082. Tagalog (Filipino)
																				083. Ireland						083. Tamil
																				084. Israel						084. Telugu
																				085. Italy						085. Thai
																				086. Ivory Coast						086. Turkish
																				087. Jamaica						087. Turkmen
																				088. Japan						088. Ukrainian
																				089. Jordan						089. Urdu
																				090. Kazakhstan						090. Uyghur
																				091. Kenya						091. Uzbek
																				092. Kiribati						092. Vietnamese
																				093. Korea, North						093. Wu
																				094. Korea, South						094. Xhosa
																				095. Kosovo						095. Xiang
																				096. Kuwait						096. Yoruba
																				097. Kyrgyzstan						097. Yue
																				098. Laos						098. Zhuang
																				099. Latvia						099. Zulu
																				100. Lebanon						100. Language Not Included In The List
																				101. Lesotho
																				102. Liberia
																				103. Libya
																				104. Liechtenstein
																				105. Lithuania
																				106. Luxembourg
																				107. Madagascar
																				108. Malawi
																				109. Malaysia
																				110. Maldives
																				111. Mali
																				112. Malta
																				113. Marshall Islands
																				114. Mauritania
																				115. Mauritius
																				116. Mexico
																				117. Micronesia
																				118. Moldova
																				119. Monaco
																				120. Mongolia
																				121. Montenegro
																				122. Morocco
																				123. Mozambique
																				124. Myanmar
																				125. Namibia
																				126. Nauru
																				127. Nepal
																				128. Netherlands
																				129. New Zealand
																				130. Nicaragua
																				131. Niger
																				132. Nigeria
																				133. Niue
																				134. North Macedonia
																				135. Norway
																				136. Oman
																				137. Pakistan
																				138. Palau
																				139. Palestine
																				140. Panama
																				141. Papua New Guinea
																				142. Paraguay
																				143. Peru
																				144. Philippines
																				145. Poland
																				146. Portugal
																				147. Qatar
																				148. Romania
																				149. Russia
																				150. Rwanda
																				151. Sahrawi Arab Democratic Republic
																				152. Saint Kitts and Nevis
																				153. Saint Lucia
																				154. Saint Vincent and the Grenadines
																				155. Samoa
																				156. San Marino
																				157. São Tomé and Príncipe
																				158. Saudi Arabia
																				159. Senegal
																				160. Serbia
																				161. Seychelles
																				162. Sierra Leone
																				163. Singapore
																				164. Slovakia
																				165. Slovenia
																				166. Solomon Islands
																				167. Somalia
																				168. Somaliland
																				169. South Africa
																				170. South Sudan
																				171. Spain
																				172. Sri Lanka
																				173. Sudan
																				174. Suriname
																				175. Sweden
																				176. Switzerland
																				177. Syria
																				178. Taiwan
																				179. Tajikistan
																				180. Tanzania
																				181. Thailand
																				182. Togo
																				183. Tonga
																				184. Trinidad and Tobago
																				185. Tunisia
																				186. Turkey
																				187. Turkmenistan
																				188. Tuvalu
																				189. Uganda
																				190. Ukraine
																				191. United Arab Emirates
																				192. United Kingdom
																				193. United States
																				194. Uruguay
																				195. Uzbekistan
																				196. Vanuatu
																				197. Vatican City
																				198. Venezuela
																				199. Vietnam
																				200. Yemen
																				201. Zambia
																				202. Zimbabwe
																				203. Other Nationality
																				204. No Nationality
[truncated: 423 more columns]

## Sheet: ClinicalRecordData
	Q000	Q001	Q002	Q003	Q004	Q005	Q006	Q007	Q08	Q09	Q010	Q011	Q012_1	Q012_2	Q012_3	Q013_1	Q013_2	Q013_3	Q014	Q015	Q016	Q017	Q017_01	Q017_02	Q017_03	Q017_04	Q017_05	Q017_06	Q017_07	Q017_08	Q017_09	Q017_10	Q017_11	Q017_12	Q017_13	Q017_14	Q017_15	Q017_16	Q017_17	Q017_18	Q017_19	Q017_20	Q017_21	Q017_22	Q017_23	Q017_24	Q017_25	Q017_26	Q017_27
Recorded Date	Patient Code	Sex (as assigned at birth)	Age* (*) Please scroll to the end of the list if this information is not available	Height in cm* (*) Please scroll to the end of the list if this information is not available	Weight in Kg* (*) Please scroll to the end of the list if this information is not available	Gender	Sexual Orientation	Ethnicity	Education	Occupation	Socio-economic status	Family-social support network	Date of therapy start - Day	Date of therapy start - Month	Date of therapy start - Year	Date of record compilation or therapy end/interruption - Day	Date of record compilation or therapy end/interruption - Month	Date of record compilation or therapy end/interruption - Year	Therapy concluded	Problem 1 reported by the patient or observed (since therapy start*) (*) Emerged at any time during therapy.	Problem 2 reported by the patient or observed (since therapy start*) (*) Emerged at any time during therapy.	Problem 3 reported by the patient or observed (since therapy start*) (*) Emerged at any time during therapy.	(1) Addiction to a certain behavior (e.g. sexual, video games, social networks, etc.)	(2) Being stuck with planning	(3) Dealing with a health problem of a loved one	(4) Dealing with bereavement	(5) Dealing with one or more abuses	(6) Dealing with one or more traumatic events	(7) Dealing with one's own health problem	(8) Dealing with the end of a relationship	(9) Difficulties in achieving one's goals	(10) Difficulties in many social situations, with people in general	(11) Difficulties in some particular social situations	(12) Difficulties in the relationships with both parents	(13) Difficulties in the relationships with colleagues	(14) Difficulties in the relationships with friends	(15) Difficulties in the relationships with one's children	(16) Difficulties in the relationships with one's partner	(17) Difficulties in the relationships with the father	(18) Difficulties in the relationships with the mother	(19) Difficulties in the relationships with various family members	(20) Difficulties in work / study	(21) Excessive conformity / Unassertiveness	(22) Fear of certain situations (e.g. flying, taking the subway, etc.)	(23) Fear of specific animals / objects / entities (e.g. spiders, knives, demons)	(24) Feeling depressed	(25) Feeling generally dependent on one or some people	(26) Feeling generally under stress	(27) Feeling pressured into antisocial behavior (not accepted by society)
	P01	2	38	168	53	2	1	1	13	4	3	3	1	2	2017	4	12	2023	2	34	20	51	0	0	0	0	0	0	0	0	0	0	0	0	0	0	0	0	0	0	0	1	0	0	0	0	0	0	0
	P02	2	25	163	54	2	1	1	6	1	3	3	1	3	2021	17	4	2023	1	1	38	43	1	0	0	0	0	0	0	0	0	0	0	0	0	0	0	0	0	0	0	0	0	0	0	0	0	0	0
	P03	2	28	169	67	2	1	1	8	16	3	4	17	9	2021	30	8	2022	1	48	32	11	0	0	0	0	0	0	0	0	0	0	1	0	0	0	0	0	0	0	0	0	0	0	0	0	0	0	0
	P04	1	28	171	70	1	1	1	6	7	3	4	20	2	2013	28	11	2023	2	48	18	36	0	0	0	0	0	0	0	0	0	0	0	0	0	0	0	0	0	1	0	0	0	0	0	0	0	0	0
	P05	1	30	172	75	1	1	1	11	2	3	4	5	1	2022	22	11	2023	2	33	20	12	0	0	0	0	0	0	0	0	0	0	0	1	0	0	0	0	0	0	0	1	0	0	0	0	0	0	0
	P06	2	32	175	55	2	1	1	8	7	3	4	19	1	2022	6	7	2023	1	4	52	16	0	0	0	1	0	0	0	0	0	0	0	0	0	0	0	1	0	0	0	0	0	0	0	0	0	0	0
	P07	1	34	191	84	1	1	1	11	5	4	4	25	1	2022	22	11	2023	2	33	1	4	1	0	0	1	0	0	0	0	0	0	0	0	0	0	0	0	0	0	0	0	0	0	0	0	0	0	0
	P08	2	52	170	66	2	1	1	6	14	3	3	4	2	2022	22	11	2023	2	16	44	19	0	0	0	0	0	0	0	0	0	0	0	0	0	0	0	1	0	0	1	0	0	0	0	0	0	0	0
	P09	1	20	170	65	2	1	1	6	1	3	3	16	2	2022	27	10	2022	1	18	33	35	0	0	0	0	0	0	0	0	0	0	0	0	0	0	0	0	0	1	0	0	0	0	0	0	0	0	0
	P10	1	37	180	80	1	1	1	8	7	3	4	1	2	2022	18	7	2022	1	33	8	0	0	0	0	0	0	0	0	1	0	0	0	0	0	0	0	0	0	0	0	0	0	0	0	0	0	0	0
	P11	2	27	167	65	2	1	1	8	14	3	4	11	4	2022	20	5	2022	1	4	33	8	0	0	0	1	0	0	0	1	0	0	0	0	0	0	0	0	0	0	0	0	0	0	0	0	0	0	0
	P12	2	26	169	58	2	1	1	11	5	3	3	8	4	2022	8	7	2022	1	48	18	16	0	0	0	0	0	0	0	0	0	0	0	0	0	0	0	1	0	1	0	0	0	0	0	0	0	0	0
	P13	1	26	183	83	1	5	1	6	11	3	3	26	4	2022	9	1	2023	1	6	41	36	0	0	0	0	0	1	0	0	0	0	0	0	0	0	0	0	0	0	0	0	0	0	0	0	0	0	0
	P14	2	35	165	56	2	1	1	11	3	3	4	4	5	2022	22	11	2023	2	48	9	18	0	0	0	0	0	0	0	0	1	0	0	0	0	0	0	0	0	1	0	0	0	0	0	0	0	0	0
	P15	2	41	165	78	2	1	1	8	12	3	3	1	6	2020	2	12	2023	1	16	9	2	0	1	0	0	0	0	0	0	1	0	0	0	0	0	0	1	0	0	0	0	0	0	0	0	0	0	0
	P16	2	59	167	76	2	2	1	6	10	3	3	9	8	2023	13	10	2022	1	33	12	0	0	0	0	0	0	0	0	0	0	0	0	1	0	0	0	0	0	0	0	0	0	0	0	0	0	0	0
	P17	2	45	160	63	2	1	1	6	14	3	2	23	8	2022	24	10	2022	1	36	48	17	0	0	0	0	0	0	0	0	0	0	0	0	0	0	0	0	1	0	0	0	0	0	0	0	0	0	0
	P18	2	31	168	65	2	1	1	11	4	3	4	24	8	2022	2	8	2023	2	36	35	30	0	0	0	0	0	0	0	0	0	0	0	0	0	0	0	0	0	0	0	0	0	0	0	0	0	0	0
	P19	2	26	167	49	2	1	1	6	1	3	4	31	8	2022	5	10	2022	1	30	24	0	0	0	0	0	0	0	0	0	0	0	0	0	0	0	0	0	0	0	0	0	0	0	0	1	0	0	0
	P20	2	32	155	51	2	1	1	7	8	3	3	12	4	2018	10	6	2023	1	5	6	12	0	0	0	0	1	1	0	0	0	0	0	1	0	0	0	0	0	0	0	0	0	0	0	0	0	0	0
	P21	2	58	164	63	2	1	1	7	8	3	3	3	10	2022	19	6	2023	1	30	48	4	0	0	0	1	0	0	0	0	0	0	0	0	0	0	0	0	0	0	0	0	0	0	0	0	0	0	0
	P22	2	61	163	70	2	1	1	6	13	3	3	13	9	2022	26	6	2023	1	30	24	52	0	0	0	0	0	0	0	0	0	0	0	0	0	0	0	0	0	0	0	0	0	0	0	1	0	0	0
	P23	2	21	163	60	2	1	1	6	1	3	4	3	2	2022	24	11	2023	2	20	14	18	0	0	0	0	0	0	0	0	0	0	0	0	0	1	0	0	0	1	0	1	0	0	0	0	0	0	0
	P24	2	51	153	65	2	1	1	12	14	3	4	3	2	2022	24	11	2023	2	20	19	50	0	0	0	0	0	0	0	0	0	0	0	0	0	0	0	0	0	0	1	1	0	0	0	0	0	0	0
	P25	2	38	163	55	2	1	1	13	4	4	4	1	2	2021	4	10	2021	1	9	31	33	0	0	0	0	0	0	0	0	1	0	0	0	0	0	0	0	0	0	0	0	0	0	0	0	0	0	0
	P26	2	24	150	47	2	1	1	6	1	3	4	13	10	2022	4	4	2023	1	33	17	25	0	0	0	0	0	0	0	0	0	0	0	0	0	0	0	0	1	0	0	0	0	0	0	0	1	0	0
	P27	1	42	176	65	1	1	1	7	12	3	3	22	8	2022	5	1	2023	1	19	16	4	0	0	0	1	0	0	0	0	0	0	0	0	0	0	0	1	0	0	1	0	0	0	0	0	0	0	0
	P28	2	30	172	64	2	3	1	8	15	2	2	16	12	2022	24	7	2023	1	30	24	11	0	0	0	0	0	0	0	0	0	0	1	0	0	0	0	0	0	0	0	0	0	0	0	1	0	0	0
	P29	2	35	160	80	2	1	1	13	5	4	4	14	1	2023	23	11	2023	2	52	30	53	0	0	0	0	0	0	0	0	0	0	0	0	0	0	0	0	0	0	0	0	0	0	0	0	0	0	0
	P30	2	27	171	75	2	1	1	8	5	3	5	11	1	2023	24	11	2023	2	20	19	48	0	0	0	0	0	0	0	0	0	0	0	0	0	0	0	0	0	0	1	1	0	0	0	0	0	0	0
	P31	2	53	162	86	2	1	1	6	13	3	3	14	8	2019	23	11	2023	2	6	15	30	0	0	0	0	0	1	0	0	0	0	0	0	0	0	1	0	0	0	0	0	0	0	0	0	0	0	0
	P32	2	54	170	68	2	1	1	8	7	3	4	14	5	2014	27	6	2023	2	16	15	5	0	0	0	0	1	0	0	0	0	0	0	0	0	0	1	1	0	0	0	0	0	0	0	0	0	0	0
	P33	2	36	168	59	2	1	1	14	2	3	3	8	1	2022	24	11	2023	2	9	16	41	0	0	0	0	0	0	0	0	1	0	0	0	0	0	0	1	0	0	0	0	0	0	0	0	0	0	0
	P34	2	52	174	91	2	1	1	12	3	3	2	22	1	2022	25	11	2023	2	18	30	10	0	0	0	0	0	0	0	0	0	1	0	0	0	0	0	0	0	1	0	0	0	0	0	0	0	0	0
	P35	2	31	173	70	2	2	1	12	6	3	3	23	2	2023	31	10	2023	1	20	33	10	0	0	0	0	0	0	0	0	0	1	0	0	0	0	0	0	0	0	0	1	0	0	0	0	0	0	0
	P36	2	40	172	88	2	1	1	12	3	3	3	6	4	2023	6	5	2023	1	30	36	6	0	0	0	0	0	1	0	0	0	0	0	0	0	0	0	0	0	0	0	0	0	0	0	0	0	0	0
	P37	2	48	173	56	2	1	1	6	12	3	3	27	3	2023	7	7	2023	1	6	4	24	0	0	0	1	0	1	0	0	0	0	0	0	0	0	0	0	0	0	0	0	0	0	0	1	0	0	0
	P38	1	27	185	80	1	1	1	10	6	4	4	13	3	2023	7	6	2023	1	33	20	0	0	0	0	0	0	0	0	0	0	0	0	0	0	0	0	0	0	0	0	1	0	0	0	0	0	0	0
	P39	2	55	160	58	2	1	1	14	3	3	3	9	3	2023	24	11	2023	2	4	6	16	0	0	0	1	0	1	0	0	0	0	0	0	0	0	0	1	0	0	0	0	0	0	0	0	0	0	0
	P40	2	33	171	57	2	1	1	13	13	3	3	18	1	2022	25	11	2023	2	26	16	50	0	0	0	0	0	0	0	0	0	0	0	0	0	0	0	1	0	0	0	0	0	0	0	0	0	1	0
	P41	2	24	160	43	2	1	1	8	1	3	3	14	4	2023	24	11	2023	2	1	48	7	1	0	0	0	0	0	1	0	0	0	0	0	0	0	0	0	0	0	0	0	0	0	0	0	0	0	0
	P42	2	36	178	63	2	1	1	8	7	3	4	21	7	2022	25	11	2023	2	44	20	41	0	0	0	0	0	0	0	0	0	0	0	0	0	0	0	0	0	0	0	1	0	0	0	0	0	0	0
	P43	1	42	192	82	1	1	1	9	18	3	3	22	3	2023	5	6	2023	1	16	0	0	0	0	0	0	0	0	0	0	0	0	0	0	0	0	0	1	0	0	0	0	0	0	0	0	0	0	0
	P44	1	31	176	73	1	1	1	6	7	3	3	5	5	2023	29	8	2023	1	24	48	2	0	1	0	0	0	0	0	0	0	0	0	0	0	0	0	0	0	0	0	0	0	0	0	1	0	0	0
	P45	2	31	155	57	2	1	1	6	14	3	3	15	3	2023	25	11	2023	1	12	16	0	0	0	0	0	0	0	0	0	0	0	0	1	0	0	0	1	0	0	0	0	0	0	0	0	0	0	0
	P46	1	34	190	124	1	2	1	6	12	2	2	6	7	2022	25	11	2023	2	16	41	44	0	0	0	0	0	0	0	0	0	0	0	0	0	0	0	1	0	0	0	0	0	0	0	0	0	0	0
	P47	2	25	165	60	2	1	1	10	14	3	3	23	5	2023	25	11	2023	2	32	12	48	0	0	0	0	0	0	0	0	0	0	0	1	0	0	0	0	0	0	0	0	0	0	0	0	0	0	0
	P48	2	63	162	75	2	1	1	12	10	4	3	2	5	2023	25	11	2023	2	33	19	31	0	0	0	0	0	0	0	0	0	0	0	0	0	0	0	0	0	0	1	0	0	0	0	0	0	0	0
	P49	2	32	160	100	2	1	1	6	7	2	3	8	1	2022	25	11	2023	2	16	32	44	0	0	0	0	0	0	0	0	0	0	0	0	0	0	0	1	0	0	0	0	0	0	0	0	0	0	0
	P50	2	35	167	53	2	1	1	9	4	3	3	19	6	2023	25	11	2023	2	30	36	31	0	0	0	0	0	0	0	0	0	0	0	0	0	0	0	0	0	0	0	0	0	0	0	0	0	0	0
	P51	1	31	189	85	1	1	1	14	2	3	4	24	1	2013	26	11	2023	2	48	10	30	0	0	0	0	0	0	0	0	0	1	0	0	0	0	0	0	0	0	0	0	0	0	0	0	0	0	0
	P52	2	27	175	60	2	1	1	9	13	4	4	16	5	2023	4	10	2023	1	30	35	0	0	0	0	0	0	0	0	0	0	0	0	0	0	0	0	0	0	0	0	0	0	0	0	0	0	0	0
	P53	2	48	173	61	2	1	1	6	14	3	3	19	6	2023	28	11	2023	1	48	10	12	0	0	0	0	0	0	0	0	0	1	0	1	0	0	0	0	0	0	0	0	0	0	0	0	0	0	0
	P54	2	38	160	127	2	1	1	13	14	3	4	19	6	2023	26	11	2023	2	32	51	44	0	0	0	0	0	0	0	0	0	0	0	0	0	0	0	0	0	0	0	0	0	0	0	0	0	0	0
	P55	1	40	169	65	1	1	1	7	16	4	5	6	8	2020	25	11	2023	2	24	10	35	0	0	0	0	0	0	0	0	0	1	0	0	0	0	0	0	0	0	0	0	0	0	0	1	0	0	0
	P56	1	46	170	71	2	1	1	6	12	3	5	11	7	2022	25	11	2023	2	16	0	0	0	0	0	0	0	0	0	0	0	0	0	0	0	0	0	1	0	0	0	0	0	0	0	0	0	0	0
	P57	2	26	160	63	2	1	1	8	14	3	4	30	6	2023	7	8	2023	1	30	2	48	0	1	0	0	0	0	0	0	0	0	0	0	0	0	0	0	0	0	0	0	0	0	0	0	0	0	0
	P58	2	33	160	53	2	3	1	6	10	3	4	5	6	2023	26	11	2023	2	31	18	16	0	0	0	0	0	0	0	0	0	0	0	0	0	0	0	1	0	1	0	0	0	0	0	0	0	0	0
	P59	2	27	170	63	2	1	1	13	13	3	4	7	8	2023	26	11	2023	2	30	12	48	0	0	0	0	0	0	0	0	0	0	0	1	0	0	0	0	0	0	0	0	0	0	0	0	0	0	0
	P60	2	27	166	52	2	1	1	8	1	3	4	4	9	2023	26	11	2023	2	30	51	20	0	0	0	0	0	0	0	0	0	0	0	0	0	0	0	0	0	0	0	1	0	0	0	0	0	0	0
	P61	1	36	185	95	1	1	1	6	5	3	2	27	1	2022	2	12	2023	2	16	41	8	0	0	0	0	0	0	0	1	0	0	0	0	0	0	0	1	0	0	0	0	0	0	0	0	0	0	0
	P62	2	22	158	52	2	1	1	8	1	3	3	7	9	2023	26	11	2023	2	6	30	36	0	0	0	0	0	1	0	0	0	0	0	0	0	0	0	0	0	0	0	0	0	0	0	0	0	0	0
	P63	2	33	167	54	2	1	1	6	14	3	3	30	10	2023	26	11	2023	2	33	12	5	0	0	0	0	1	0	0	0	0	0	0	1	0	0	0	0	0	0	0	0	0	0	0	0	0	0	0
	P64	2	56	173	76	2	1	1	6	14	3	4	22	5	2023	6	1	2024	2	16	3	0	0	0	1	0	0	0	0	0	0	0	0	0	0	0	0	1	0	0	0	0	0	0	0	0	0	0	0
	P65	2	38	165	52	2	1	1	10	6	3	4	13	2	2023	4	12	2023	2	36	32	4	0	0	0	1	0	0	0	0	0	0	0	0	0	0	0	0	0	0	0	0	0	0	0	0	0	0	0
	P66	2	42	168	63	2	1	7	11	5	3	3	25	11	2023	6	1	2024	No	16	19	0	0	0	0	0	0	0	0	0	0	0	0	0	0	0	0	1	0	0	1	0	0	0	0	0	0	0	0
	P67	1	43	164	54	1	1	1	11	5	3	3	25	11	2023	6	1	2024	No	16	0	0	0	0	0	0	0	0	0	0	0	0	0	0	0	0	0	1	0	0	0	0	0	0	0	0	0	0	0
																							3	3	1	8	3	7	1	3	4	5	2	8	0	1	2	19	2	7	6	9	0	0	0	6	1	1	0
																							19
[truncated: 148 more columns]

## Sheet: ClinicalRecordCoding
	Q000	Q001		Q002		Q003		Q004		Q005		Q006		Q007		Q008		Q009		Q010		Q011		Q012_1	Q012_2		Q012_3	Q013_1	Q013_2		Q013_3	Q014		Q015		Q016	Q017		Q018		Q019	Q020	Q021	Q022		Q023		Q023a
Recorded Date	Patient Code	Sex (as assigned at birth)	Code	Age* (*) Please scroll to the end of the list if this information is not available	Code	Height in cm* (*) Please scroll to the end of the list if this information is not available	Code	Weight in Kg* (*) Please scroll to the end of the list if this information is not available	Code	Gender	Code	Sexual Orientation	Code	Ethnicity	Code	Education	Code	Occupation	Code	Socio-economic status	Code	Family-social support network	Code	Date of therapy start - Day	Date of therapy start - Month	Code	Date of therapy start - Year	Date of record compilation or therapy end/interruption - Day	Date of record compilation or therapy end/interruption - Month	Code	Date of record compilation or therapy end/interruption - Year	Therapy concluded	Code	Problem 1 reported by the patient or observed (since therapy start*) (*) Emerged at any time during therapy.	Code	Problem 2 reported by the patient or observed (since therapy start*) (*) Emerged at any time during therapy.	Problem 3 reported by the patient or observed (since therapy start*) (*) Emerged at any time during therapy.	Code	Symptom 1 reported by the patient or observed (since therapy start*) (*) Emerged at any time during therapy.	Code	Symptom 2 reported by the patient or observed (since therapy start*) (*) Emerged at any time during therapy.	Symptom 3 reported by the patient or observed (since therapy start*) (*) Emerged at any time during therapy.	Symptom 4 reported by the patient or observed (since therapy start*) (*) Emerged at any time during therapy.	Symptom 5 reported by the patient or observed (since therapy start*) (*) Emerged at any time during therapy.	Code	Previous psychotherapy	Code	Reason for previous psychotherapy	Code
		Male	1	18-120	18-120	Less than 100		Less than 20		Male	1	Heterosexual	1	European	1	01. They didn't attend any school	1	01. Student	1	(1) Very low	1	(1) Very weak	1	1-31	January	1	2000-2049	1-31	January	1	2000-2049	Yes	1	(0) No Problem	0	Same as Q015		0	(0) No symptom	0	Same as Q018				0	Yes	1	(0) Data Not Available	0
		Female	2	[ Data Not Available ]	0	100-230	100-230	20-350	20-350	Female	2	Homosexual	2	North African	2	02. They attended school but didn't get any qualification	2	02. Professional in the Research/University Area (Researcher, University Professor etc.)	2	(2) Low	2	(2) Weak	2		February	2			February	2		No	2	(1) Addiction to a certain behavior (e.g. sexual, video games, social networks, etc.)	1			1	(1) Alexithymia	1					1	No	2	(1) Addiction to a certain behavior (e.g. sexual, video games, social networks, etc.)	1
		Other	3			More than 230		More than 350		Fluid	3	Bisexual	3	Central-West African	3	03. They completed elementary school (age 6-10)	3	03. Professional in the Education Area (School Teacher, etc.)	3	(3) Medium	3	(3) Medium	3		March	3			March	3				(2) Being stuck with planning	2			2	(2) Anhedonia	2					2	[ Data Not Available ]	0	(2) Being stuck with planning	2
		[ Data Not Available ]	0			[ Data Not Available ]	0	[ Data Not Available ]	0	Trans	4	Asexual	4	Central-East African	4	04. They completed middle school (age 10-13)	4	04. Professional in the Health/Social Area (Doctor, Psychologist, Educator, Social Worker, etc.)	4	(4) High	4	(4) Good	4		April	4			April	4				(3) Dealing with a health problem of a loved one	3			3	(3) Being aggressive / Excessively self-imposing	3					3			(3) Dealing with a health problem of a loved one	3
										Non-Binary	5	Uncertain	5	South African	5	05. They have a post middle school professional qualification	5	05. Professional in the Technical/Scientific Area (Engineer, Architect, Chemist, Programmer, etc.)	5	(5) Very high	5	(5) Very good	5		May	5			May	5				(4) Dealing with bereavement	4			4	(4) Burn-out	4					4			(4) Dealing with bereavement	4
										Queer	6	Other	6	Middle-Eastern	6	06. They completed high school (age 13-18)	6	06. Professional in the Legal/Administrative Area (Lawyer, Accountant, Bookkeper, Secretary, etc.)	6	[ Data Not Available ]	0	[ Data Not Available ]	0		June	6			June	6				(5) Dealing with one or more abuses	5			5	(5) Confused thoughts or reduced ability to concentrate	5					5			(5) Dealing with one or more abuses	5
										Other	7	[ Data Not Available ]	0	Russian Asian	7	07. They have a post high school professional qualification	7	07. Professional in the Art/Entertainment Area (Musician, Actor, etc.)	7						July	7			July	7				(6) Dealing with one or more traumatic events	6			6	(6) Difficulties in understanding and relating to situations and people	6					6			(6) Dealing with one or more traumatic events	6
										[ Data Not Available ]	0			Chinese	8	08. They have a bachelor degree	8	08. Professional in the Aesthetic/Wellness Area (Beautician, Coach, etc.)	8						August	8			August	8				(7) Dealing with one's own health problem	7			7	(7) Dissociative symptoms (depersonalization, derealization)	7					7			(7) Dealing with one's own health problem	7
														Indian	9	09. They have a post-bachelor professional qualification	9	09. Professional in the Religious Area (Vicar, Priest, etc.)	9						September	9			September	9				(8) Dealing with the end of a relationship	8			8	(8) Eating symptom: dysregulated eating (e.g. diets, restrictions, binges, purges, etc.)	8					8			(8) Dealing with the end of a relationship	8
														South-East Asian	10	10. They have a post-bachelor specialization	10	10. Professional in the Law Enforcement/Military Area (Policeman, Soldier, etc.)	10						October	10			October	10				(9) Difficulties in achieving one's goals	9			9	(9) Eating symptom: worry (e.g. about weight, body image, physical shape, etc.)	9					9			(9) Difficulties in achieving one's goals	9
														North American	11	11. They have a master degree	11	11. Manager of Commercial Activity (Goods)	11						November	11			November	11				(10) Difficulties in many social situations, with people in general	10			10	(10) Extreme changes in mood with ups and downs	10					10			(10) Difficulties in many social situations, with people in general	10
														Central American	12	12. They have a post-master professional qualification	12	12. Employee of Commercial Activity (Goods) (Shop Assistant, etc.)	12						December	12			December	12				(11) Difficulties in some particular social situations	11			11	(11) Extreme feelings of guilt	11					11			(11) Difficulties in some particular social situations	11
														South American	13	13. They have a post-master specialization	13	13. Office Manager (Services)	13															(12) Difficulties in the relationships with both parents	12			12	(12) Fear for one's own safety and/or health	12					12			(12) Difficulties in the relationships with both parents	12
														Australian	14	14. They have a doctorate (PhD)	14	14. Office Clerk (Services) (Customer Care Employee, etc.)	14															(13) Difficulties in the relationships with colleagues	13			13	(13) Fear of rejection / abandonment	13					13			(13) Difficulties in the relationships with colleagues	13
														Mixed	15	[ Data Not Available ]	0	15. Manual Worker (Construction Worker, Craftsman, etc.)	15															(14) Difficulties in the relationships with friends	14			14	(14) Generalized anxiety	14					14			(14) Difficulties in the relationships with friends	14
														Other	16			16. Unemployed	16															(15) Difficulties in the relationships with one's children	15			15	(15) Hyper-rationalization	15					15			(15) Difficulties in the relationships with one's children	15
														[ Data Not Available ]	0			17. Retired	17															(16) Difficulties in the relationships with one's partner	16			16	(16) Inability to cope with daily problems / stress	16					16			(16) Difficulties in the relationships with one's partner	16
																		18. Other	18															(17) Difficulties in the relationships with the father	17			17	(17) Inability to manage anger	17					17			(17) Difficulties in the relationships with the father	17
																		[ Data Not Available ]	0															(18) Difficulties in the relationships with the mother	18			18	(18) Manic states	18					18			(18) Difficulties in the relationships with the mother	18
																																		(19) Difficulties in the relationships with various family members	19			19	(19) Normalization / dismissing attitude	19					19			(19) Difficulties in the relationships with various family members	19
																																		(20) Difficulties in work / study	20			20	(20) Obsessions and/or compulsions	20					20			(20) Difficulties in work / study	20
																																		(21) Excessive conformity / Unassertiveness	21			21	(21) Panic attacks	21					21			(21) Excessive conformity / Unassertiveness	21
																																		(22) Fear of certain situations (e.g. flying, taking the subway, etc.)	22			22	(22) Paranoia	22					22			(22) Fear of certain situations (e.g. flying, taking the subway, etc.)	22
																																		(23) Fear of specific animals / objects / entities (e.g. spiders, knives, demons)	23			23	(23) Perfectionism / Rigidity	23					23			(23) Fear of specific animals / objects / entities (e.g. spiders, knives, demons)	23
																																		(24) Feeling depressed	24			24	(24) Problem in the sexual sphere	24					24			(24) Feeling depressed	24
																																		(25) Feeling generally dependent on one or some people	25			25	(25) Problem with substance use	25					25			(25) Feeling generally dependent on one or some people	25
																																		(26) Feeling generally under stress	26			26	(26) Psychotic detachment from reality (delusions, hallucinations, etc.)	26					26			(26) Feeling generally under stress	26
																																		(27) Feeling pressured into antisocial behavior (not accepted by society)	27			27	(27) Resentment at lack of care / attention	27					27			(27) Feeling pressured into antisocial behavior (not accepted by society)	27
																																		(28) Feeling pressured into behaviors considered evil	28			28	(28) Sad mood, feeling down	28					28			(28) Feeling pressured into behaviors considered evil	28
																																		(29) Feeling pressured to behave differently from others	29			29	(29) Self-harm	29					29			(29) Feeling pressured to behave differently from others	29
																																		(30) Feeling too anxious	30			30	(30) Sense of constraint in relationships and/or certain situations	30					30			(30) Feeling too anxious	30
																																		(31) General existential distress	31			31	(31) Significant tiredness, low energy, or trouble sleeping	31					31			(31) General existential distress	31
																																		(32) Having a better understanding of oneself / the world	32			32	(32) Social anxiety	32					32			(32) Having a better understanding of oneself / the world	32
																																		(33) Having a better understanding of oneself and one's relationships with others	33			33	(33) Stress	33					33			(33) Having a better understanding of oneself and one's relationships with others	33
																																		(34) Having a better understanding of what one wants	34			34	(34) Suicidal thoughts	34					34			(34) Having a better understanding of what one wants	34
																																		(35) Obsession with certain things	35			35	(35) Withdrawal from friends and activities	35					35			(35) Obsession with certain things	35
																																		(36) Panic attacks	36			36	(36) Other	36					36			(36) Panic attacks	36
																																		(37) Problems accepting oneself	37			37										(37) Problems accepting oneself	37
																																		(38) Problems controlling one's impulses	38			38										(38) Problems controlling one's impulses	38
																																		(39) Problems distinguishing reality from fantasy	39			39										(39) Problems distinguishing reality from fantasy	39
																																		(40) Problems finding / maintaining a satisfying romantic relationship	40			40										(40) Problems finding / maintaining a satisfying romantic relationship	40
																																		(41) Problems relating to one's sexuality	41			41										(41) Problems relating to one's sexuality	41
																																		(42) Problems relating to sleep	42			42										(42) Problems relating to sleep	42
																																		(43) Problems with alcohol use	43			43										(43) Problems with alcohol use	43
																																		(44) Problems with food	44			44										(44) Problems with food	44
																																		(45) Problems with gambling	45			45										(45) Problems with gambling	45
																																		(46) Problems with substance use	46			46										(46) Problems with substance use	46
																																		(47) Procrastination	47			47										(47) Procrastination	47
																																		(48) Self-esteem / Sense of failure	48			48										(48) Self-esteem / Sense of failure	48
																																		(49) Worry about one's own health	49			49										(49) Worry about one's own health	49
																																		(50) Worry about one's weight and/or physical shape	50			50										(50) Worry about one's weight and/or physical shape	50
																																		(51) Worry about the future	51			51										(51) Worry about the future	51
																																		(52) Worry about the health / safety of a loved one	52			52										(52) Worry about the health / safety of a loved one	52
																																		(53) Other	53			53										(53) Other	53
[truncated: 37 more columns]

## Sheet: Correlations
	Pearson Correlations - ACQ Means with Symptom Groups										Spearman Correlations - ACQ Means with Symptom Groups										Pearson Correlations Between Dimensions										Spearman Correlations Between Dimensions
			ACQ Means										ACQ Means										A1D_C_Mean	A2A_C_Mean	A3A_C_Mean	A4P_C_Mean	A5D_C_Mean	A6S_C_Mean	A7O_C_Mean					A1D_C_Mean	A2A_C_Mean	A3A_C_Mean	A4P_C_Mean	A5D_C_Mean	A6S_C_Mean	A7O_C_Mean
	Symptom Group		Dis	Av	Am	P	D	S	O		Symptom Group		Dis	Av	Am	P	D	S	O		A1D_C_Mean	Pearson Correlation	1	.289*	.598**	.291*	.326**	.447**	.419**		Spearman's rho	A1D_C_Mean	Correlation Coefficient	1	.290*	.552**	.286*	.256*	.444**	.331**
	Dis Symptoms	r	.352**	0.226722	.293*	-0.163634	.319**	0.239067	0.000123962		Dis Symptoms	rho	.400**	.248*	.276*	-0.134994	.304*	.242*	-0.0624299			Sig. (2-tailed)		0.0176288	9.13928e-08	0.016865	0.00708505	0.00015009	0.000423087				Sig. (2-tailed)		0.0172585	1.29088e-06	0.0189191	0.0362839	0.000168032	0.00625224
		Sig.	0.00350828	0.0650407	0.0161925	0.185791	0.00849231	0.05137	0.999206			Sig.	0.000803905	0.0432393	0.0238365	0.276078	0.0123746	0.0487565	0.615749			N	67	67	67	67	67	67	67				N	67	67	67	67	67	67	67
		N	67	67	67	67	67	67	67			N	67	67	67	67	67	67	67		A2A_C_Mean	Pearson Correlation	.289*	1	.333**	-0.189535	.300*	0.0448842	0.136192			A2A_C_Mean	Correlation Coefficient	.290*	1	0.207662	-0.133655	.263*	0.0206639	0.125589
	Av Symptoms	r	0.105286	0.0235296	-0.0318705	0.0650138	-0.0894031	-0.103388	0.0748849		Av Symptoms	rho	0.0812637	0.0455158	-0.0498387	0.0401093	-0.0693305	-0.132223	0.0985999			Sig. (2-tailed)	0.0176288		0.00589949	0.124496	0.0137014	0.718353	0.271798				Sig. (2-tailed)	0.0172585		0.0917513	0.280912	0.0312151	0.868176	0.311221
		Sig.	0.396469	0.850093	0.79793	0.601183	0.471853	0.405085	0.546994			Sig.	0.513282	0.714558	0.688774	0.747256	0.577195	0.286144	0.427298			N	67	67	67	67	67	67	67				N	67	67	67	67	67	67	67
		N	67	67	67	67	67	67	67			N	67	67	67	67	67	67	67		A3A_C_Mean	Pearson Correlation	.598**	.333**	1	0.0897341	.358**	.367**	.277*			A3A_C_Mean	Correlation Coefficient	.552**	0.207662	1	0.0654077	.316**	.412**	0.177782
	Am Symptoms	r	0.189665	0.0391169	0.207154	0.186563	-0.210831	0.177582	-0.0110334		Am Symptoms	rho	0.226262	0.0396765	0.236533	0.192562	-0.237966	0.164597	-0.0279155			Sig. (2-tailed)	9.13928e-08	0.00589949		0.470208	0.00292645	0.00222899	0.0230274				Sig. (2-tailed)	1.29088e-06	0.0917513		0.598976	0.00916167	0.000536176	0.15006
		Sig.	0.124233	0.753308	0.0925649	0.130623	0.0867943	0.150526	0.929388			Sig.	0.0656009	0.749893	0.0539656	0.118482	0.0524845	0.183179	0.822569			N	67	67	67	67	67	67	67				N	67	67	67	67	67	67	67
		N	67	67	67	67	67	67	67			N	67	67	67	67	67	67	67		A4P_C_Mean	Pearson Correlation	.291*	-0.189535	0.0897341	1	0.0324278	.392**	.283*			A4P_C_Mean	Correlation Coefficient	.286*	-0.133655	0.0654077	1	0.0682552	.304*	.252*
	P Symptoms	r	0.0285539	-.274*	-0.0471306	.284*	-0.103725	0.0187527	-0.0182636		P Symptoms	rho	0.0692082	-.240*	-0.0780764	.296*	-0.113549	-0.00443758	-0.0505752			Sig. (2-tailed)	0.016865	0.124496	0.470208		0.794473	0.00104015	0.020371				Sig. (2-tailed)	0.0189191	0.280912	0.598976		0.583129	0.0123192	0.0397921
		Sig.	0.81858	0.0247417	0.704887	0.019863	0.403548	0.880274	0.883375			Sig.	0.577868	0.0499505	0.529994	0.0148383	0.36024	0.97157	0.684415			N	67	67	67	67	67	67	67				N	67	67	67	67	67	67	67
		N	67	67	67	67	67	67	67			N	67	67	67	67	67	67	67		A5D_C_Mean	Pearson Correlation	.326**	.300*	.358**	0.0324278	1	.297*	.321**			A5D_C_Mean	Correlation Coefficient	.256*	.263*	.316**	0.0682552	1	.372**	0.23059
	D Symptoms	r	-0.0435965	0.0693476	0.109764	0.202584	0.00900444	0.185743	-0.0700065		D Symptoms	rho	0.0690755	0.0298758	0.0802721	.241*	0.0373303	0.153126	-0.130683			Sig. (2-tailed)	0.00708505	0.0137014	0.00292645	0.794473		0.0146765	0.0079863				Sig. (2-tailed)	0.0362839	0.0312151	0.00916167	0.583129		0.00191754	0.0604731
		Sig.	0.726111	0.577101	0.376574	0.100152	0.942348	0.132353	0.573479			Sig.	0.5786	0.810334	0.518452	0.049512	0.764242	0.216045	0.291843			N	67	67	67	67	67	67	67				N	67	67	67	67	67	67	67
		N	67	67	67	67	67	67	67			N	67	67	67	67	67	67	67		A6S_C_Mean	Pearson Correlation	.447**	0.0448842	.367**	.392**	.297*	1	0.030528			A6S_C_Mean	Correlation Coefficient	.444**	0.0206639	.412**	.304*	.372**	1	0.00813219
	S Symptoms	r	-0.0413543	0.0750667	-0.13587	0.10554	-0.0490228	.294*	0.0303392		S Symptoms	rho	0.0706566	0.0364995	-0.190218	0.0567077	-0.08772	.267*	0.0326107			Sig. (2-tailed)	0.00015009	0.718353	0.00222899	0.00104015	0.0146765		0.806273				Sig. (2-tailed)	0.000168032	0.868176	0.000536176	0.0123192	0.00191754		0.947925
		Sig.	0.739684	0.546019	0.272944	0.395324	0.693614	0.0158093	0.807448			Sig.	0.569916	0.769341	0.123119	0.64853	0.48027	0.0288452	0.793339			N	67	67	67	67	67	67	67				N	67	67	67	67	67	67	67
		N	67	67	67	67	67	67	67			N	67	67	67	67	67	67	67		A7O_C_Mean	Pearson Correlation	.419**	0.136192	.277*	.283*	.321**	0.030528	1			A7O_C_Mean	Correlation Coefficient	.331**	0.125589	0.177782	.252*	0.23059	0.00813219	1
	O Symptoms	r	0.0693585	0.0434167	-0.042909	0.0390297	0.134074	0.0841532	.275*		O Symptoms	rho	0.0588793	-0.0142475	-0.026589	0.000950121	0.138622	0.0997408	.266*			Sig. (2-tailed)	0.000423087	0.271798	0.0230274	0.020371	0.0079863	0.806273					Sig. (2-tailed)	0.00625224	0.311221	0.15006	0.0397921	0.0604731	0.947925
		Sig.	0.577041	0.727196	0.730264	0.753841	0.279392	0.498366	0.0245485			Sig.	0.636007	0.908895	0.830873	0.993912	0.263256	0.421943	0.0296379			N	67	67	67	67	67	67	67				N	67	67	67	67	67	67	67
		N	67	67	67	67	67	67	67			N	67	67	67	67	67	67	67		*. Correlation is significant at the 0.05 level (2-tailed).										*. Correlation is significant at the 0.05 level (2-tailed).
	Substances Symptoms	r	0.191009	-0.0903025	0.166311	0.16191	.335**	0.150487	.263*		Substances Symptoms	rho	.240*	-0.108923	0.122509	0.179323	.279*	0.174745	0.229151		**. Correlation is significant at the 0.01 level (2-tailed).										**. Correlation is significant at the 0.01 level (2-tailed).
		Sig.	0.121539	0.467389	0.178599	0.190533	0.00565832	0.224157	0.0317619			Sig.	0.0499526	0.380264	0.323331	0.146502	0.0222308	0.157262	0.0621408
		N	67	67	67	67	67	67	67			N	67	67	67	67	67	67	67
	Unspecific Attachment Symptoms	r	-0.0652374	-0.0156884	-0.00914057	0.0190996	-0.0489268	-0.0259225	0.0818776		Unspecific Attachment Symptoms	rho	-0.118138	0.0283191	0.0175732	0.0293045	-0.0253797	-0.0410172	0.13376
		Sig.	0.59993	0.899727	0.941478	0.878076	0.694185	0.835052	0.510094			Sig.	0.341025	0.820046	0.887754	0.813895	0.838459	0.741732	0.280533
		N	67	67	67	67	67	67	67			N	67	67	67	67	67	67	67
	Psychotic Symptoms	r	-0.147386	-.264*	-.266*	0.00600556	-0.192539	-0.180682	-0.141356		Psychotic Symptoms	rho	-0.140105	-0.184717	-0.194225	-0.0191144	-0.203746	-0.197472	-0.191052
		Sig.	0.233961	0.0307561	0.0297326	0.961531	0.118527	0.143416	0.253865			Sig.	0.258133	0.134542	0.115275	0.877982	0.098179	0.109205	0.121453
		N	67	67	67	67	67	67	67			N	67	67	67	67	67	67	67
	Uncertain Symptoms	r	-0.178036	-0.0667753	-0.0673605	-0.00773317	0.11106	0.135123	-0.0473892		Uncertain Symptoms	rho	-0.152801	-0.0337985	-0.0675808	-0.00587977	0.133673	0.157249	-0.0573002
		Sig.	0.14947	0.591342	0.588088	0.950476	0.370929	0.275614	0.703343			Sig.	0.217034	0.785988	0.586865	0.962336	0.280849	0.203785	0.645104
		N	67	67	67	67	67	67	67			N	67	67	67	67	67	67	67
	Non Attachment Symptoms	r	0.00599473	0.0887609	0.000828733	-0.070039	0.179559	0.0514044	-0.176477		Non Attachment Symptoms	rho	-0.0354312	0.0426861	0.0813258	-0.0636456	0.187585	0.136929	-0.169103
		Sig.	0.9616	0.475055	0.994689	0.5733	0.145963	0.67952	0.153125			Sig.	0.775914	0.731612	0.512959	0.608877	0.128491	0.269189	0.171313
		N	67	67	67	67	67	67	67			N	67	67	67	67	67	67	67
	**. Correlation is significant at the 0.01 level (2-tailed).										**. Correlation is significant at the 0.01 level (2-tailed).	rho
	*. Correlation is significant at the 0.05 level (2-tailed).										*. Correlation is significant at the 0.05 level (2-tailed).	Sig.
												N

## Sheet: Regressions
Dis	Mean: A1D_C_Mean - Symptoms: Q022b_A1D										Av	Mean: A2A_C_Mean - Symptoms: Q022b_A2A										Am	Mean: A3A_C_Mean - Symptoms: Q022b_A3A										P	Mean: A4P_C_Mean - Symptoms: Q022b_A4P										D	Mean: A5D_C_Mean - Symptoms: Q022b_A5D
	LOGISTIC REGRESSION VARIABLES Q022b_A1D											LOGISTIC REGRESSION VARIABLES Q022b_A2A											LOGISTIC REGRESSION VARIABLES Q022b_A3A											LOGISTIC REGRESSION VARIABLES Q022b_A4P											LOGISTIC REGRESSION VARIABLES Q022b_A5D
	/METHOD=ENTER A1D_C_Mean											/METHOD=ENTER A2A_C_Mean											/METHOD=ENTER A3A_C_Mean											/METHOD=ENTER A4P_C_Mean											/METHOD=ENTER A5D_C_Mean
	/CLASSPLOT											/CLASSPLOT											/CLASSPLOT											/CLASSPLOT											/CLASSPLOT
	/CASEWISE OUTLIER(2)											/CASEWISE OUTLIER(2)											/CASEWISE OUTLIER(2)											/CASEWISE OUTLIER(2)											/CASEWISE OUTLIER(2)
	/PRINT=GOODFIT CORR CI(95)											/PRINT=GOODFIT CORR CI(95)											/PRINT=GOODFIT CORR CI(95)											/PRINT=GOODFIT CORR CI(95)											/PRINT=GOODFIT CORR CI(95)
	/CRITERIA=PIN(0.05) POUT(0.10) ITERATE(20) CUT(0.5).											/CRITERIA=PIN(0.05) POUT(0.10) ITERATE(20) CUT(0.5).											/CRITERIA=PIN(0.05) POUT(0.10) ITERATE(20) CUT(0.5).											/CRITERIA=PIN(0.05) POUT(0.10) ITERATE(20) CUT(0.5).											/CRITERIA=PIN(0.05) POUT(0.10) ITERATE(20) CUT(0.5).
	Logistic Regression											Logistic Regression											Logistic Regression											Logistic Regression											Logistic Regression
	Case Processing Summary											Case Processing Summary											Case Processing Summary											Case Processing Summary											Case Processing Summary
	Unweighted Casesa		N	Percent								Unweighted Casesa		N	Percent								Unweighted Casesa		N	Percent								Unweighted Casesa		N	Percent								Unweighted Casesa		N	Percent
	Selected Cases	Included in Analysis	67	100								Selected Cases	Included in Analysis	67	100								Selected Cases	Included in Analysis	67	100								Selected Cases	Included in Analysis	67	100								Selected Cases	Included in Analysis	67	100
		Missing Cases	0	0									Missing Cases	0	0									Missing Cases	0	0									Missing Cases	0	0									Missing Cases	0	0
		Total	67	100									Total	67	100									Total	67	100									Total	67	100									Total	67	100
	Unselected Cases		0	0								Unselected Cases		0	0								Unselected Cases		0	0								Unselected Cases		0	0								Unselected Cases		0	0
	Total		67	100								Total		67	100								Total		67	100								Total		67	100								Total		67	100
	a. If weight is in effect, see classification table for the total number of cases.											a. If weight is in effect, see classification table for the total number of cases.											a. If weight is in effect, see classification table for the total number of cases.											a. If weight is in effect, see classification table for the total number of cases.											a. If weight is in effect, see classification table for the total number of cases.
	Dependent Variable Encoding											Dependent Variable Encoding											Dependent Variable Encoding											Dependent Variable Encoding											Dependent Variable Encoding
	Original Value	Internal Value										Original Value	Internal Value										Original Value	Internal Value										Original Value	Internal Value										Original Value	Internal Value
	.00	0										.00	0										.00	0										.00	0										.00	0
	1.00	1										1.00	1										1.00	1										1.00	1										1.00	1
	Block 0: Beginning Block											Block 0: Beginning Block											Block 0: Beginning Block											Block 0: Beginning Block											Block 0: Beginning Block
	Classification Tablea,b											Classification Tablea,b											Classification Tablea,b											Classification Tablea,b											Classification Tablea,b
	Observed			Predicted								Observed			Predicted								Observed			Predicted								Observed			Predicted								Observed			Predicted
				Q022b_A1D		Percentage Correct									Q022b_A2A		Percentage Correct									Q022b_A3A		Percentage Correct									Q022b_A4P		Percentage Correct									Q022b_A5D
				.00	1.00										.00	1.00										.00	1.00										.00	1.00										.00	1.00
	Step 0	Q022b_A1D	.00	55	0	100						Step 0	Q022b_A2A	.00	57	0	100						Step 0	Q022b_A3A	.00	62	0	100						Step 0	Q022b_A4P	.00	50	0	100						Step 0	Q022b_A5D	.00	64	0
			1.00	12	0	0								1.00	10	0	0								1.00	5	0	0								1.00	17	0	0								1.00	3	0
		Overall Percentage				82.0896							Overall Percentage				85.0746							Overall Percentage				92.5373							Overall Percentage				74.6269							Overall Percentage
	a. Constant is included in the model.											a. Constant is included in the model.											a. Constant is included in the model.											a. Constant is included in the model.											a. Constant is included in the model.
	b. The cut value is .500											b. The cut value is .500											b. The cut value is .500											b. The cut value is .500											b. The cut value is .500
	Variables in the Equation											Variables in the Equation											Variables in the Equation											Variables in the Equation											Variables in the Equation
			B	S.E.	Wald	df	Sig.	Exp(B)						B	S.E.	Wald	df	Sig.	Exp(B)						B	S.E.	Wald	df	Sig.	Exp(B)						B	S.E.	Wald	df	Sig.	Exp(B)						B	S.E.	Wald
	Step 0	Constant	-1.52243	0.318614	22.8319	1	1.76808e-06	0.218182				Step 0	Constant	-1.74047	0.342847	25.771	1	3.84422e-07	0.175439				Step 0	Constant	-2.5177	0.464897	29.3288	1	6.10825e-08	0.0806452				Step 0	Constant	-1.07881	0.280755	14.765	1	0.000121774	0.34				Step 0	Constant	-3.06027	0.590727	26.8378
	Variables not in the Equation											Variables not in the Equation											Variables not in the Equation											Variables not in the Equation											Variables not in the Equation
				Score	df	Sig.									Score	df	Sig.									Score	df	Sig.									Score	df	Sig.									Score	df
	Step 0	Variables	A1D_C_Mean	8.29178	1	0.00398249						Step 0	Variables	A2A_C_Mean	0.0370939	1	0.847274						Step 0	Variables	A3A_C_Mean	2.87516	1	0.0899558						Step 0	Variables	A4P_C_Mean	5.4033	1	0.0200987						Step 0	Variables	A5D_C_Mean	0.00543235	1
		Overall Statistics		8.29178	1	0.00398249							Overall Statistics		0.0370939	1	0.847274							Overall Statistics		2.87516	1	0.0899558							Overall Statistics		5.4033	1	0.0200987							Overall Statistics		0.00543235	1
	Block 1: Method = Enter											Block 1: Method = Enter											Block 1: Method = Enter											Block 1: Method = Enter											Block 1: Method = Enter
	Omnibus Tests of Model Coefficients											Omnibus Tests of Model Coefficients											Omnibus Tests of Model Coefficients											Omnibus Tests of Model Coefficients											Omnibus Tests of Model Coefficients
			Chi-square	df	Sig.									Chi-square	df	Sig.									Chi-square	df	Sig.									Chi-square	df	Sig.									Chi-square	df	Sig.
	Step 1	Step	13.5514	1	0.000232117							Step 1	Step	0.0376052	1	0.846238							Step 1	Step	3.68142	1	0.055022							Step 1	Step	6.16273	1	0.013047							Step 1	Step	0.00541303	1	0.94135
		Block	13.5514	1	0.000232117								Block	0.0376052	1	0.846238								Block	3.68142	1	0.055022								Block	6.16273	1	0.013047								Block	0.00541303	1	0.94135
		Model	13.5514	1	0.000232117								Model	0.0376052	1	0.846238								Model	3.68142	1	0.055022								Model	6.16273	1	0.013047								Model	0.00541303	1	0.94135
	Model Summary											Model Summary											Model Summary											Model Summary											Model Summary
	Step	-2 Log likelihood	Cox & Snell R Square	Nagelkerke R Square								Step	-2 Log likelihood	Cox & Snell R Square	Nagelkerke R Square								Step	-2 Log likelihood	Cox & Snell R Square	Nagelkerke R Square								Step	-2 Log likelihood	Cox & Snell R Square	Nagelkerke R Square								Step	-2 Log likelihood	Cox & Snell R Square	Nagelkerke R Square
	1	49.433a	0.183117	0.300489								1	56.432a	0.000561113	0.000985261								1	31.888a	0.0534643	0.129793								1	69.735a	0.0878776	0.129638								1	24.495a	8.07883e-05	0.000263781
	a. Estimation terminated at iteration number 7 because parameter estimates changed by less than .001.											a. Estimation terminated at iteration number 5 because parameter estimates changed by less than .001.											a. Estimation terminated at iteration number 7 because parameter estimates changed by less than .001.											a. Estimation terminated at iteration number 5 because parameter estimates changed by less than .001.											a. Estimation terminated at iteration number 6 because parameter estimates changed by less than .001.
	Hosmer and Lemeshow Test											Hosmer and Lemeshow Test											Hosmer and Lemeshow Test											Hosmer and Lemeshow Test											Hosmer and Lemeshow Test
	Step	Chi-square	df	Sig.								Step	Chi-square	df	Sig.								Step	Chi-square	df	Sig.								Step	Chi-square	df	Sig.								Step	Chi-square	df	Sig.
	1	2.52565	7	0.925153								1	19.6349	8	0.0118091								1	3.6075	7	0.823712								1	12.1525	7	0.0956531								1	6.46945	7	0.486122
	Contingency Table for Hosmer and Lemeshow Test											Contingency Table for Hosmer and Lemeshow Test											Contingency Table for Hosmer and Lemeshow Test											Contingency Table for Hosmer and Lemeshow Test											Contingency Table for Hosmer and Lemeshow Test
			Q022b_A1D = .00		Q022b_A1D = 1.00		Total							Q022b_A2A = .00		Q022b_A2A = 1.00		Total							Q022b_A3A = .00		Q022b_A3A = 1.00		Total							Q022b_A4P = .00		Q022b_A4P = 1.00		Total							Q022b_A5D = .00		Q022b_A5D = 1.00
			Observed	Expected	Observed	Expected								Observed	Expected	Observed	Expected								Observed	Expected	Observed	Expected								Observed	Expected	Observed	Expected								Observed	Expected	Observed
	Step 1	1	7	6.99579	0	0.00421366	7					Step 1	1	6	6.07805	1	0.921945	7					Step 1	1	7	6.96981	0	0.0301932	7					Step 1	1	7	6.59081	0	0.409189	7					Step 1	1	7	6.70474	0
		2	7	6.96013	0	0.0398733	7						2	7	6.01391	0	0.986091	7						2	8	7.84789	0	0.152112	8						2	7	6.23231	0	0.767688	7						2	7	6.70008	0
		3	6	5.81609	0	0.183905	6						3	4	5.9856	3	1.0144	7						3	7	6.7646	0	0.235401	7						3	6	5.96099	1	1.03901	7						3	8	7.65446	0
		4	5	5.58922	1	0.410782	6						4	7	5.97092	0	1.02908	7						4	6	6.70615	1	0.293852	7						4	5	5.66991	2	1.33009	7						4	6	6.69424	1
		5	7	6.93724	1	1.06276	8						5	5	4.25032	0	0.749684	5						5	7	6.57943	0	0.420572	7						5	4	5.32817	3	1.67183	7						5	7	7.64382	1
		6	6	5.77183	1	1.22817	7						6	7	5.93646	0	1.06354	7						6	8	7.41435	0	0.585646	8						6	7	4.91524	0	2.08476	7						6	7	6.68214	0
		7	6	6.9335	3	2.0665	9						7	5	5.07538	1	0.924617	6						7	6	6.38395	1	0.616052	7						7	3	5.42344	5	2.57656	8						7	6	6.67759	1
		8	6	4.93447	1	2.06553	7						8	3	5.91452	4	1.08548	7						8	6	6.19269	1	0.807306	7						8	4	5.05712	4	2.94288	8						8	6	5.72049	0
		9	5	5.06173	5	4.93827	10						9	7	5.89899	0	1.10101	7						9	7	7.14113	2	1.85887	9						9	7	4.822	2	4.178	9						9	10	9.52244	0
													10	6	5.87585	1	1.12415	7
	Classification Tablea																						Classification Tablea											Classification Tablea											Classification Tablea
	Observed			Predicted								Classification Tablea											Observed			Predicted								Observed			Predicted								Observed			Predicted
				Q022b_A1D		Percentage Correct						Observed			Predicted											Q022b_A3A		Percentage Correct									Q022b_A4P		Percentage Correct									Q022b_A5D
				.00	1.00										Q022b_A2A		Percentage Correct									.00	1.00										.00	1.00										.00	1.00
	Step 1	Q022b_A1D	.00	54	1	98.1818									.00	1.00							Step 1	Q022b_A3A	.00	62	0	100						Step 1	Q022b_A4P	.00	48	2	96						Step 1	Q022b_A5D	.00	64	0
			1.00	11	1	8.33333						Step 1	Q022b_A2A	.00	57	0	100								1.00	5	0	0								1.00	17	0	0								1.00	3	0
		Overall Percentage				82.0896								1.00	10	0	0							Overall Percentage				92.5373							Overall Percentage				71.6418							Overall Percentage
	a. The cut value is .500												Overall Percentage				85.0746						a. The cut value is .500											a. The cut value is .500											a. The cut value is .500
												a. The cut value is .500
	Variables in the Equation																						Variables in the Equation											Variables in the Equation											Variables in the Equation
			B	S.E.	Wald	df	Sig.	Exp(B)	95% C.I.for EXP(B)			Variables in the Equation													B	S.E.	Wald	df	Sig.	Exp(B)	95% C.I.for EXP(B)					B	S.E.	Wald	df	Sig.	Exp(B)	95% C.I.for EXP(B)					B	S.E.	Wald
									Lower	Upper				B	S.E.	Wald	df	Sig.	Exp(B)	95% C.I.for EXP(B)											Lower	Upper										Lower	Upper
	Step 1a	A1D_C_Mean	1.04953	0.409476	6.56949	1	0.0103741	2.85631	1.28014	6.37311										Lower	Upper		Step 1a	A3A_C_Mean	0.674531	0.40223	2.81225	1	0.093547	1.96311	0.892413	4.31842		Step 1a	A4P_C_Mean	0.623026	0.280569	4.93098	1	0.0263793	1.86456	1.07586	3.23145		Step 1a	A5D_C_Mean	0.0204553	0.277579	0.00543051
		Constant	-8.89723	3.08201	8.33378	1	0.00389147	0.000136767				Step 1a	A2A_C_Mean	0.0392806	0.204045	0.0370598	1	0.847343	1.04006	0.69723	1.55147			Constant	-7.05106	2.9398	5.75272	1	0.0164632	0.00086649					Constant	-4.93425	1.82221	7.33238	1	0.00677233	0.00719587					Constant	-3.14524	1.30593	5.80055
	a. Variable(s) entered on step 1: A1D_C_Mean.												Constant	-1.95745	1.18595	2.72427	1	0.0988336	0.141218				a. Variable(s) entered on step 1: A3A_C_Mean.											a. Variable(s) entered on step 1: A4P_C_Mean.											a. Variable(s) entered on step 1: A5D_C_Mean.
												a. Variable(s) entered on step 1: A2A_C_Mean.
	Correlation Matrix																						Correlation Matrix											Correlation Matrix											Correlation Matrix
			Constant	A1D_C_Mean								Correlation Matrix													Constant	A3A_C_Mean										Constant	A4P_C_Mean										Constant	A5D_C_Mean
	Step 1	Constant	1	-0.993367										Constant	A2A_C_Mean								Step 1	Constant	1	-0.986597								Step 1	Constant	1	-0.986926								Step 1	Constant	1	-0.891835
		A1D_C_Mean	-0.993367	1								Step 1	Constant	1	-0.957277									A3A_C_Mean	-0.986597	1									A4P_C_Mean	-0.986926	1									A5D_C_Mean	-0.891835	1
													A2A_C_Mean	-0.957277	1
	Step number: 1																						Step number: 1											Step number: 1											Step number: 1
												Step number: 1
	Observed Groups and Predicted Probabilities																						Observed Groups and Predicted Probabilities											Observed Groups and Predicted Probabilities											Observed Groups and Predicted Probabilities
												Observed Groups and Predicted Probabilities
	16 + +																						16 + +											8 + +											80 + +
	I I											40 + +											I I											I I											I I
	I I											I I											I I											I I											I I
	F I0 I											I I											F I I											F I I											F I 0 I
	R 12 +0 +											F I 1 I											R 12 + +											R 6 + 1 +											R 60 + 0 +
	E I0 I											R 30 + 1 +											E I I											E I 1 I											E I 0 I
	Q I0 I											E I 0 I											Q I I											Q I 0 1 I											Q I 0 I
	U I0 I											Q I 0 I											U I0 1 I											U I 0 1 I											U I 0 I
	E 8 +0 +											U I 0 I											E 8 +0 0 0 +											E 4 + 0 0 1 1 +											E 40 + 0 +
	N I0 I											E 20 + 10 +											N I0 0 0 I											N I 0 0 1 1 I											N I 0 I
	C I0 I											N I 00 I											C I0 0 0 1 I											C I 0 0 0 1 1 1 000 1 I											C I 0 I
	Y I0 I											C I 00 I											Y I0 00 0 0 I											Y I 0 0 0 1 1 1 000 1 I											Y I 0 I
	4 +0 1 1 +											Y I 00 I											4 +0 000 000 0 +											2 + 0 00 0 00 0 0 10 000 1 0 1 0 1 0 +											20 + 0 +
	I00 00 01 1 0 0 1 0 1 I											10 + 00 +											I0 0000000 0 I											I 0 00 0 00 0 0 10 000 1 0 1 0 1 0 I											I 0 I
	I00 00 000 0 01 0 0 0 1 1 I											I 000 I											I000000000 1 0 1 0 0 I											I 00 000 00 00 100 0100 0 000 10 001 0 0 10 0 0 I											I 0 I
	I000 0000 1 000 00 00 0 0 0 0 0 0 1 0 0 0 0 1 0 I											I 0000 I											I0000000000000 0 00 0 1 0 I											I 00 000 00 00 100 0100 0 000 10 001 0 0 10 0 0 I											I 0 I
	Predicted ---------+---------+---------+---------+---------+---------+---------+---------+---------+----------											I 10000 I											Predicted ---------+---------+---------+---------+---------+---------+---------+---------+---------+----------											Predicted ---------+---------+---------+---------+---------+---------+---------+---------+---------+----------											Predicted ---------+---------+---------+---------+---------+---------+---------+---------+---------+----------
	Prob: 0 .1 .2 .3 .4 .5 .6 .7 .8 .9 1											Predicted ---------+---------+---------+---------+---------+---------+---------+---------+---------+----------											Prob: 0 .1 .2 .3 .4 .5 .6 .7 .8 .9 1											Prob: 0 .1 .2 .3 .4 .5 .6 .7 .8 .9 1											Prob: 0 .1 .2 .3 .4 .5 .6 .7 .8 .9 1
	Group: 0000000000000000000000000000000000000000000000000011111111111111111111111111111111111111111111111111											Prob: 0 .1 .2 .3 .4 .5 .6 .7 .8 .9 1											Group: 0000000000000000000000000000000000000000000000000011111111111111111111111111111111111111111111111111											Group: 0000000000000000000000000000000000000000000000000011111111111111111111111111111111111111111111111111											Group: 0000000000000000000000000000000000000000000000000011111111111111111111111111111111111111111111111111
												Group: 0000000000000000000000000000000000000000000000000011111111111111111111111111111111111111111111111111
	Predicted Probability is of Membership for 1.00																						Predicted Probability is of Membership for 1.00											Predicted Probability is of Membership for 1.00											Predicted Probability is of Membership for 1.00
	The Cut Value is .50											Predicted Probability is of Membership for 1.00											The Cut Value is .50											The Cut Value is .50											The Cut Value is .50
	Symbols: 0 - .00											The Cut Value is .50											Symbols: 0 - .00											Symbols: 0 - .00											Symbols: 0 - .00
	1 - 1.00											Symbols: 0 - .00											1 - 1.00											1 - 1.00											1 - 1.00
	Each Symbol Represents 1 Case.											1 - 1.00											Each Symbol Represents 1 Case.											Each Symbol Represents .5 Cases.											Each Symbol Represents 5 Cases.
												Each Symbol Represents 2.5 Cases.
	Casewise Listb																						Casewise Listb											Casewise Lista											Casewise Listb
	Case	Selected Statusa	Observed	Predicted	Predicted Group	Temporary Variable						Casewise Listb											Case	Selected Statusa	Observed	Predicted	Predicted Group	Temporary Variable																	Case	Selected Statusa	Observed	Predicted	Predicted Group
			Q022b_A1D			Resid	ZResid	SResid				Case	Selected Statusa	Observed	Predicted	Predicted Group	Temporary Variable								Q022b_A3A			Resid	ZResid	SResid				a. The casewise plot is not produced because no outliers were found.													Q022b_A5D
	14	S	1**	0.134076	0	0.865924	2.54135	2.03159						Q022b_A2A			Resid	ZResid	SResid				10	S	1**	0.0389319	0	0.961068	4.96849	2.57698															22	S	1**	0.0461485	0
	20	S	1**	0.101538	0	0.898462	2.97464	2.17076				19	S	1**	0.128946	0	0.871054	2.59907	2.13621				15	S	1**	0.0887219	0	0.911278	3.20487	2.22244															23	S	1**	0.0446417	0
	a. S = Selected, U = Unselected cases, and ** = Misclassified cases.											a. S = Selected, U = Unselected cases, and ** = Misclassified cases.											26	S	1**	0.143108	0	0.856892	2.44699	2.00743															55	S	1**	0.0436919	0
	b. Cases with studentized residuals greater than 2.000 are listed.											b. Cases with studentized residuals greater than 2.000 are listed.											30	S	1**	0.106502	0	0.893498	2.89646	2.1401															a. S = Selected, U = Unselected cases, and ** = Misclassified cases.
																							a. S = Selected, U = Unselected cases, and ** = Misclassified cases.																						b. Cases with studentized residuals greater than 2.000 are listed.
																							b. Cases with studentized residuals greater than 2.000 are listed.
[truncated: 25 more columns]
